1 **Chronotropic Incompetence among People with HIV Improves with Exercise Training in**  
2 **the Exercise for Healthy Aging Study**

3 Short Title: Chronotropic Incompetence in HIV Improves with Exercise Training

4 Authors: Matthew S. Durstenfeld<sup>1</sup>, Melissa P. Wilson<sup>2</sup>, Catherine M. Jankowski<sup>3</sup>, Grace L.  
5 Ditzenberger<sup>2</sup>, Chris T. Longenecker<sup>4</sup>, Kristine M. Erlandson<sup>2</sup>

6

7 Affiliations:

- 8 1) Division of Cardiology at ZSFG and Department of Medicine, University of California,  
9 San Francisco (UCSF), USA  
10 2) Department of Medicine, University of Colorado, Anschutz Medical Campus, Aurora,  
11 Colorado, USA  
12 3) College of Nursing, University of Colorado, Anschutz Medical Campus, Aurora,  
13 Colorado, USA  
14 4) Division of Cardiology and Department of Global Health, University of Washington  
15 Medical Center, Seattle, WA, USA

16 **Corresponding author:**

17 Matthew S. Durstenfeld, MD MAS  
18 Division of Cardiology, UCSF at Zuckerberg San Francisco General Hospital  
19 1001 Potrero Avenue, 5G8  
20 San Francisco, CA 94110, USA  
21 Tel: +1 628 206 5562; Fax: +1 628 206 5447  
22 e-mail: [matthew.durstenfeld@ucsf.edu](mailto:matthew.durstenfeld@ucsf.edu)  
23 twitter: @durstenfeld

24 Word Count: 2943

25 **Keywords:** HIV, cardiorespiratory fitness, chronotropic incompetence, exercise training, VO<sub>2</sub>,  
26 adjusted heart rate reserve/chronotropic index

27

28 **Disclosures:**

29

30 **Funding:** This study was funded by the National Institute on Aging to Dr. Erlandson (K23  
31 AG050260 and K24AG082527). Dr. Durstenfeld is funded by NIH grant NIH/NLBI (K12  
32 HL143961).

33 **Abstract**

34 **Background:** People with HIV (PWH) have lower exercise capacity compared to HIV-  
35 uninfected peers, which may be explained by chronotropic incompetence (CI), the inability to  
36 increase heart rate during exercise.

37 **Methods:** The Exercise for Healthy Aging Study included adults ages 50-75 with and without  
38 HIV. Participants completed 12 weeks of moderate intensity exercise, before randomization to  
39 moderate or high intensity for 12 additional weeks. We compared adjusted heart rate reserve  
40 (AHRR; CI <80%) on cardiopulmonary exercise testing by HIV serostatus, and change from  
41 baseline to 12 and 24 weeks using mixed effects models.

42 **Results:** Among 32 PWH and 37 controls (median age 56, 7% female, mean BMI 28 kg/m<sup>2</sup>),  
43 28% of PWH compared to 11% of controls had CI at baseline (p=0.067). AHRR was lower  
44 among PWH (91 vs 102%; difference 11%, 95% CI 2.5-19.7; p=0.01). At week 12, AHRR  
45 normalized among PWH (+8%, 95% CI 4-11; p<0.001) and was sustained at week 24 (+5,  
46 95% CI 1-9; p=0.008) compared to no change among controls (95% CI -4 to 4; p=0.95;  
47 p<sub>interaction</sub>=0.004). After 24 weeks of exercise, only 15% PWH and 10% of controls had CI  
48 (p=0.70).

49 **Conclusions:** Chronotropic incompetence contributes to reduced exercise capacity among PWH  
50 and improves with exercise training.

51

## 52 **Introduction**

53           People with HIV (PWH) have excess cardiovascular disease [1] and reduced  
54 cardiorespiratory fitness (peak exercise capacity) compared to the general population without  
55 HIV [2-7]. A major contributor to reduced cardiorespiratory fitness among PWH may be  
56 chronotropic incompetence, which occurs in approximately one third of PWH [8, 9].  
57 Chronotropic incompetence is the inability to increase heart rate adequately during exercise to  
58 meet increased metabolic demands, which results in a lower peak exercise capacity. The gold-  
59 standard test for chronotropic incompetence is cardiopulmonary exercise testing (CPET) which  
60 includes measurement of gas exchange to quantify exercise capacity in terms of oxygen  
61 consumption (peak  $\text{VO}_2$ ). Among people without HIV, chronotropic incompetence even among  
62 asymptomatic individuals without cardiovascular disease is associated with increased risk of  
63 development of incident cardiovascular disease and mortality [10-14]. The two prior studies of  
64 chronotropic incompetence among PWH were both cross-sectional and did not include  
65 assessments of body composition or baseline physical activity which could be unmeasured  
66 confounders in the observed association between HIV and chronotropy [8, 9].

67           Little is known about treatment of chronotropic incompetence outside of populations of  
68 people with heart failure. In that patient population, implanting pacemakers to increase maximal  
69 exertional heart rate does not improve symptoms or exercise capacity [15]. In contrast,  
70 supervised exercise training improves chronotropy and exercise capacity among people with  
71 heart failure [16]. Observational data among people with pacemakers suggests that  
72 improvements in chronotropy are associated with improved quality of life [17]. However,  
73 whether a supervised exercise training program modifies chronotropic incompetence among  
74 people without heart failure, especially among PWH, has not been studied to our knowledge.

75           Therefore, we designed this secondary analysis of the Exercise for Healthy Aging Study,  
76 a clinical trial of a supervised exercise training intervention among people with and without HIV,  
77 to test the hypotheses that (1) HIV would be associated with chronotropic incompetence at  
78 baseline, and (2) chronotropy would improve with exercise training.

## 79 **Methods**

80 *Study Design:* This study is a secondary analysis of the Exercise For Healthy Aging Study, a  
81 clinical trial of an exercise intervention among sedentary adults age 50-75 with and without HIV  
82 from 2014-2017 (clinicaltrials.gov NCT02404792).[18] Participants exercised at moderate  
83 intensity for weeks 1-12 and were then randomized to continue moderate or advance to a higher  
84 intensity of exercise for weeks 13-24.

85 *Participants:* The Exercise for Healthy Aging study enrolled people with HIV (PWH) and HIV-  
86 uninfected controls age 50-75 years who were sedentary (<60 minutes of physical activity each  
87 week for 6 months by self-report) and without contraindications to participating in an exercise  
88 program; PWH were required to be on stable antiretroviral therapy with viral load < 200  
89 copies/mL and CD4 count greater than 200 cells/ $\mu$ L. Full inclusion and exclusion criteria have  
90 been published [18].

91 *Study Procedures:*

92 *Cardiopulmonary Exercise Testing:* All participants underwent a symptom-limited graded CPET  
93 using a treadmill at baseline, 12 weeks, and 24 weeks as previously described [18]. The speed  
94 was adjusted to initially target 70% of the age-predicted maximum heart rate with the grade  
95 increased by 2% every 2 minutes until volitional exhaustion or test termination for safety.  
96 Participants who did not initially reach 85% of maximum predicted heart rate on the baseline

97 study were required to undergo cardiology consultation prior to proceeding, and one person  
98 received revascularization and then was subsequently rescreened.

99 *Exercise Training Intervention:* Details of the intervention have been previously published [18].  
100 Briefly, participants attended in-person, supervised exercise training program 3 times weekly for  
101 24 weeks. The program started with 2 weeks of low-intensity exercise followed by 10 weeks of  
102 moderate-intensity exercise including both aerobic endurance exercise performed on a treadmill  
103 and strength training. At 12 weeks, participants underwent repeat CPET and were randomized to  
104 continue moderate intensity exercise or advance to high-intensity for an additional 12 weeks.  
105 Following completion of the 24-week program, participants underwent repeat CPET.

106 *Primary Exposure:* The primary exposure of interest was HIV infection.

107 *Primary Outcomes:* The primary outcomes of interest were the adjusted heart rate reserve  
108 (AHRR), a measure of exertional chronotropy defined by  $AHRR = (HR_{peak} - HR_{rest}) / (220 - Age -$   
109  $HR_{rest})$ . Chronotropic incompetence as a binary variable was defined by an adjusted heart rate  
110 reserve  $< 80\%$ . Participants on chronotropic medications (beta-blockers, calcium channel  
111 blockers) were considered to have chronotropic incompetence if  $AHRR < 62\%$  [19, 20]. The  
112 primary longitudinal outcomes were change in AHRR and chronotropic incompetence at 12  
113 weeks and 24 weeks.

114 *Secondary Outcomes:* The main secondary outcome was exercise capacity as measured by the  
115 peak oxygen consumption (Peak  $VO_2$ ) during CPET.

116 *Covariates:* We included age, sex, body mass index, body composition variables assessed using  
117 dual energy x-ray absorptiometry (DEXA) as previously reported [21], hypertension, diabetes,  
118 and HIV specific factors including nadir and current  $CD4^+$  cell count, years with diagnosis with

119 HIV, years of treatment with antiretroviral therapy (ART), and current and prior ART  
120 medications. Baseline physical activity was assessed using the International Physical Activity  
121 Questionnaire short form [22]. Biomarkers including high sensitivity C-reactive protein (hsCRP),  
122 interleukin 6 (IL-6), interleukin 10 (IL-10), tumor necrosis factor (TNF), soluble TNF receptor 1  
123 (sTNFR-1), soluble TNF receptor 2 (sTNFR-2), soluble CD14 (sCD14), and insulin-like growth  
124 factor binding protein 3 (IGFB-3) were measured on baseline plasma samples using  
125 commercially available enzyme-linked immunosorbent assays as previously reported [23].

126 *Statistical Analysis:* Study data were collected and managed using REDCap. A deidentified  
127 dataset was generated and provided for this secondary analysis. AHRR at baseline was compared  
128 using t-tests for unadjusted analyses and linear regression with HIV as the primary predictor of  
129 interest and including age, sex, and body mass index as pre-specified covariates with other  
130 covariates of interest includes in secondary analyses. Chi squared tests were used to compare the  
131 proportion with and without chronotropic incompetence by HIV status. Factors associated with  
132 chronotropic incompetence including HIV specific factors were reported by univariate analysis  
133 (Fisher's exact/chi-squared test for binary, t-test or Pearson correlation coefficients for AHRR).  
134 We subsequently included all of the cardiovascular risk factors in a linear regression model. For  
135 the longitudinal analyses, we used linear mixed effects models with random slopes and intercepts  
136 by participant, an independent covariance structure, and a clustered sandwich estimator. We  
137 considered  $p < 0.05$  to be significant for the primary outcomes and did not adjust for multiple  
138 comparisons. Given the small sample size, we only assessed for interactions with the physical  
139 activity and body composition variables and HIV status. Analyses were performed using STATA  
140 17.0.

141 *Approval:* The original study was approved by the Colorado Multiple Institution Review Board  
142 and written informed consent was obtained.

### 143 **Results**

144 At baseline, 32 PWH and 37 controls completed CPET; 28 PWH and 31 controls  
145 completed 12 weeks of moderate-intensity exercise training and 27 PWH and 29 controls  
146 completed the full 24-week trial [18]. Participants had a median age of 56 years and were  
147 predominantly male (Table 1). Mean BMI was 28 kg/m<sup>2</sup>. Among PWH, median duration with  
148 diagnosed HIV was 21 years with a median treatment duration with antiretroviral therapy of 17  
149 years.

#### 150 *Chronotropy Prior to Exercise Training*

151 Baseline CPET results are presented in Table 2. At baseline, mean AHRR was 91%  
152 (95%CI 85-96) among PWH compared to 101% among controls (95%CI 95-108; unadjusted  
153 difference 10.5%, 95%CI 2.5-19.7; p=0.02; Figure 1). With adjustment for age, sex, and body  
154 mass index, AHRR was 13% lower among PWH (95% CI 3.8-22.4; p=0.007). In a sensitivity  
155 analysis excluding those with coronary artery disease or on chronotropic medications at baseline  
156 (n=4), the magnitude of the association remained unchanged (13% lower among PWH; 95%CI  
157 5-21; p=0.002). Among PWH, 28% had chronotropic incompetence compared to 11% of  
158 controls (OR 3.2; 95%CI 0.89-11.8; p=0.08).

159 At baseline, AHRR was correlated with peak VO<sub>2</sub> ( $\rho=0.45$ , p=0.0001; Figure 2).  
160 Chronotropic incompetence at baseline was associated with 5.3 ml/kg/min lower peak VO<sub>2</sub> (95%  
161 CI -8.1 to -2.5; p<0.001) adjusted for age, sex, and body mass index. Each 10% decrease in

162 AHRR was associated with a 1.4 ml/kg/min reduction in peak  $\text{VO}_2$  (95% CI -2.0 to -0.8;  
163  $p < 0.001$ ).

#### 164 *Factors Associated with Baseline Chronotropy*

165 In exploratory analyses, we found that cardiovascular risk factors at baseline were  
166 associated with chronotropic incompetence. In univariate analysis, hypertension, coronary artery  
167 disease, chronotropic medications, current smoking, but not diabetes or dyslipidemia, were  
168 correlated with lower AHRR. As shown in Table 3, in a model including age, sex, body mass  
169 index, hypertension, dyslipidemia, diabetes, current smoking, coronary artery disease, and use of  
170 chronotropic medications, coronary artery disease was associated with 29% lower AHRR  
171 (95%CI 10-47;  $p = 0.004$ ) and chronotropic medications with 25% lower AHRR (95% CI 2-48;  
172  $p = 0.03$ ). HIV remained significantly associated with chronotropy even accounting for coronary  
173 artery disease and chronotropic medications (9% lower AHRR; 95% CI 1-17;  $p = 0.03$ ). Other  
174 factors are listed in Table 3.

175 Some body composition parameters were modestly correlated with chronotropy. In  
176 univariate analysis, body mass index ( $\rho = -0.27$   $p = 0.03$ ) and visceral adipose tissue (VAT) area  
177 ( $\rho = -0.26$ ,  $p = 0.03$ ) were negatively correlated with AHRR, with adjusted estimates reported in  
178 Table 3. Measures of lean body mass were not correlated with AHRR. There were negligible  
179 changes in estimates for the effect of HIV in models including DEXA-derived body composition  
180 variables individually or all together compared to models with BMI only or for VAT area  
181 substituted for BMI. As BMI and VAT are co-linear ( $\rho = 0.79$ ), both were associated with AHRR  
182 only when singularly included in the model (Table 3), with no interaction with BMI or VAT by  
183 HIV status ( $p_{\text{interaction}} = 0.80$  and 0.44, respectively).



184 In contrast, among this sedentary population, baseline self-reported physical activity (in  
185 MET-hours per week) was not correlated with AHRR ( $\rho=-0.16$ ,  $p=0.21$ ). In an adjusted model  
186 including age, sex, body mass index and HIV, baseline physical activity was not associated with  
187 AHRR ( $\beta=-0.04$  per MET-hour per week; 95%CI -0.09-0.02;  $p=0.20$ ) with no interaction by HIV  
188 status ( $p_{\text{interaction}}=0.87$ ).

189 In univariate analysis restricted to PWH, current CD4 count and self-reported nadir CD4  
190 were negatively correlated with AHRR ( $\rho=-0.22$ ,  $p=0.04$  and  $\rho=-0.23$ ,  $p=0.04$ , respectively).  
191 Longer ART duration was positively correlated with higher (better) AHRR ( $\rho=0.22$ ,  $p=0.046$ ). In  
192 models including age, sex, body mass index, and HIV specific variables either individually or all  
193 together, there were no statistically significant factors identified.

194 Among the inflammatory markers measured, only IL-6 was associated with chronotropy.  
195 Baseline IL-6 was associated with a 7% lower AHRR per doubling (95% CI -13 to -1;  $p=0.02$ )  
196 accounting for age, sex, and BMI, which was attenuated when additionally accounting for HIV  
197 (5%; 95% CI -11-0.3;  $p=0.06$ ). Other inflammatory markers including hsCRP, TNF, IL-10,  
198 sTNFR-1, sTNFR-2, sCD14, or IGFB-3 were not associated with chronotropy.

### 199 *Chronotropic Response to Exercise Training varies by HIV Status*

200 At week 12, AHRR normalized among PWH (+8%, 95% CI 4-11;  $p<0.001$ ) compared to  
201 0.1% increase among controls (95% CI -4 to 4;  $p=0.95$ ;  $p_{\text{interaction}}=0.004$ ; Figure 1). Mean AHRR  
202 at 12 weeks was 98% (95% CI 92-104) among PWH compared to 101% (95% CI 94-109) among  
203 controls ( $p=0.51$ ). The improvement in chronotropy among PWH was sustained at week 24  
204 (+5%, 95%CI 1-9;  $p=0.008$ ). At week 24, mean AHRR was 97% (95%CI 91-103) among PWH  
205 and 104% (95%CI 98-110) among controls ( $p=0.09$ ). Randomized assignment to the high

206 intensity exercise intervention during weeks 12-24 was not associated with a difference in  
207 AHRR from 12 to 24 weeks compared to moderate intensity ( $p=0.84$ ).

208 After 12 weeks of moderate intensity exercise 15% of PWH and 13% of controls met the  
209 definition for chronotropic incompetence ( $p=1.00$ ). Similarly, after 24 weeks of exercise, 15% of  
210 PWH and 10% of controls, respectively, met the definition for CI ( $p=0.70$ ). There was no  
211 difference at 24 weeks by intensity arm ( $p=0.39$ ).

212 Each 10% increase in AHRR from baseline was associated with a 1.2 ml/kg/min increase  
213 in peak  $\text{VO}_2$  at 12 weeks (95% CI 0.5-1.8;  $p=0.001$ ). Accounting for change in AHRR, the  
214 greater benefit of exercise observed among PWH at 12 weeks (peak  $\text{VO}_2$  increased +1.5  
215 ml/kg/min more than controls, 95%CI 0.1 to 2.9,  $p=0.04$ ) was attenuated (0.4 ml/kg/min, 95%CI  
216 -0.9 to 1.8;  $p=0.53$ ).

## 217 **Discussion**

218 Consistent with the existing literature, we found that chronotropic incompetence is a  
219 mechanism of reduced exercise capacity with a high prevalence among PWH. We expand upon  
220 the existing literature by focusing on a population of older sedentary adults with additional  
221 measures of body composition and physical activity. Adjusting for these baseline characteristics,  
222 our findings suggest that chronotropy among older sedentary PWH is not largely driven by the  
223 amount of baseline physical activity or body composition—that is, chronotropic incompetence is  
224 not likely to be simply a result of deconditioning. Importantly, we also provide the first evidence  
225 that chronotropic incompetence is modifiable in this patient population and that exercise training  
226 may be an effective intervention.

227           Research on chronotropic incompetence has only included cross-sectional assessments of  
228 chronotropy, with the exception of clinical trials in the setting of heart failure. To our knowledge,  
229 this is the first study to demonstrate that chronotropic incompetence is modifiable among  
230 patients without heart failure. Consistent with the literature in heart failure, this study provides  
231 evidence that exercise training improves chronotropy. A randomized clinical trial including  
232 individuals with heart failure with a reduced ejection fraction found that exercise training  
233 improved chronotropy and exercise capacity in the group assigned a supervised exercise training  
234 program compared to the control group [16]. There are no published studies testing exercise  
235 training or any other interventions for chronotropic incompetence among people without heart  
236 failure. Exercise training may improve chronotropy by decreasing baseline adrenergic activation  
237 seen in heart failure [16]. This leads to improved  $\beta$ -receptor responsiveness such that there is a  
238 greater increase in heart rate for a similar change in plasma catecholamines released during  
239 exercise. Another hypothesis is that exercise training might reduce inflammation. However, in  
240 this study, changes in inflammation were variable and did not consistently decrease [23].  
241 Another hypothesis is that exercise improves mitochondrial efficiency and vascular function,  
242 allowing individuals to reach a higher maximal heart rate even if there is no change in the  
243 underlying  $\beta$ -receptor response.

244           Why the prevalence of chronotropic incompetence is higher among PWH is unclear. One  
245 interesting hypothesis-generating finding is that longer duration of ART is associated with better  
246 chronotropy; in earlier eras of diagnosis, lower nadir CD4 counts resulted in earlier treatment  
247 with ART. A likely contributor to chronotropic incompetence among people with successfully  
248 treated HIV may be increased chronic inflammation, which is associated with chronotropic  
249 incompetence in this study and prior work. Besides inflammation, prior papers have not

250 identified HIV-specific factors that are clearly linked to chronotropic incompetence [8, 24].  
251 Among people without heart failure, decreased  $\beta$ -receptor responsiveness is a likely mechanism  
252 of chronotropic incompetence [25, 26]. Chronic adrenergic activation from chronic inflammation  
253 that is present among PWH, even those who are treated with ART and virally suppressed, may  
254 be a major factor driving both chronotropic incompetence and heart failure with preserved  
255 ejection fraction among PWH [27-29]. Although a number of inflammatory markers were  
256 increased among PWH in this study, only IL-6 was inversely associated with chronotropy among  
257 people with and without HIV, consistent with prior reports [24, 30]. Ultimately, chronic  
258 inflammation may lead to cardiac interstitial fibrosis which is increased among PWH [31] but  
259 not yet strongly linked to chronotropic incompetence.

260 Our finding that cardiometabolic risk factors and smoking are associated with  
261 chronotropic incompetence is consistent with prior work among people without HIV [30, 32-36].  
262 Although PWH have a higher burden of cardiovascular risk factors, these do not fully explain  
263 differences in baseline chronotropic incompetence by HIV serostatus. Cardiometabolic risk  
264 factors lead to coronary endothelial and microvascular dysfunction that may cause chronotropic  
265 incompetence, or these factors may lead to premature cessation of exercise prior to reaching peak  
266 heart rate. This is an important distinction because if it is truly causal then improving  
267 chronotropy may result in lower cardiovascular risk; if it is simply a marker of premature  
268 cessation of exercise (i.e. coronary endothelial or mitochondrial dysfunction), then chronotropic  
269 incompetence may simply be a surrogate marker for subclinical cardiovascular disease. In the  
270 general population, there are strong associations between chronotropic incompetence at baseline  
271 and subsequent incident cardiovascular disease [10] including myocardial infarction [11],  
272 ischemic stroke [12], and mortality [10, 11, 13, 14]. This has not been studied prospectively

273 among PWH, and whether improvement in chronotropy is associated with lower risk of  
274 cardiovascular events is unknown.

275         Several limitations of this secondary analysis should be noted. This was of an already  
276 completed clinical trial not designed to test the baseline prevalence of chronotropic  
277 incompetence among PWH or the effect of exercise training on chronotropy, which has distinct  
278 advantages and disadvantages. A small number of individuals had chronotropic incompetence.  
279 Individuals with known coronary artery disease and those taking chronotropic medications were  
280 included in the trial. For this secondary analysis, we chose not to exclude those on chronotropic  
281 medications but rather to use the lower threshold that has been previously published. A higher  
282 than expected proportion of participants had a low respiratory exchange ratio indicating a  
283 submaximal or  $\text{VO}_2$  peak instead of  $\text{VO}_2\text{max}$ , likely due to deconditioning in this sedentary  
284 population. However, the foundational papers suggest that the adjusted heart rate reserve using  
285 the peak heart rate can still be used in submaximal tests because it is a ratio of the percentage of  
286 the heart rate reserve used to the metabolic reserve used and not affected by the exercise  
287 protocol, stage of exercise, or functional status [10, 13, 37].

288         In summary, we have found that chronotropic incompetence may contribute to reduced  
289 exercise capacity among PWH and improves with exercise training. Questions remain as to why  
290 PWH have a higher prevalence of chronotropic incompetence than the general population, and  
291 whether chronotropic incompetence is associated with subsequent cardiovascular events or  
292 subclinical cardiovascular disease among PWH. Taken in context of the numerous other benefits  
293 of exercise, we suggest that exercise can be recommended to individuals with chronotropic  
294 incompetence. Further studies are needed to explore the mechanisms for these improvements and  
295 the intensity of exercise training needed to modify the effect on chronotropy among PWH.

296 References

- 297 1. Feinstein MJ, Hsue PY, Benjamin LA, et al. Characteristics, Prevention, and Management of  
298 Cardiovascular Disease in People Living With HIV: A Scientific Statement From the American  
299 Heart Association. *Circulation* **2019**; 140:e98-e124.
- 300 2. Pothoff G, Wassermann K, Ostmann H. Impairment of exercise capacity in various groups of  
301 HIV-infected patients. *Respiration* **1994**; 61:80-5.
- 302 3. Oursler KK, Sorkin JD, Smith BA, Katzell LI. Reduced aerobic capacity and physical  
303 functioning in older HIV-infected men. *AIDS Res Hum Retroviruses* **2006**; 22:1113-21.
- 304 4. Duong M, Dumas JP, Buisson M, et al. Limitation of exercise capacity in nucleoside-treated  
305 HIV-infected patients with hyperlactataemia. *HIV Med* **2007**; 8:105-11.
- 306 5. Gomes Neto M, Conceicao CS, Ogalha C, Brites C. Aerobic capacity and health-related  
307 quality of life in adults HIV-infected patients with and without lipodystrophy. *Braz J Infect Dis*  
308 **2016**; 20:76-80.
- 309 6. de Lima LRA, Silva DAS, da Silva KS, Pelegriani A, de Carlos Back I, Petroski EL. Aerobic  
310 Fitness and Moderate to Vigorous Physical Activity in Children and Adolescents Living with  
311 HIV. *Pediatr Exerc Sci* **2017**; 29:377-87.
- 312 7. Orton PM, Sokhela DG, Nokes KM, Perazzo JD, Webel AR. Factors related to functional  
313 exercise capacity amongst people with HIV in Durban, South Africa. *Health SA* **2021**; 26:1532.
- 314 8. De Lorenzo A, Meirelles V, Vilela F, Souza FC. Use of the exercise treadmill test for the  
315 assessment of cardiac risk markers in adults infected with HIV. *J Int Assoc Provid AIDS Care*  
316 **2013**; 12:110-6.
- 317 9. Durstenfeld MS, Peluso MJ, Spinelli MA, et al. Association of SARS-CoV-2 infection and  
318 Cardiopulmonary Long COVID with Exercise Capacity and Chronotropic Incompetence among  
319 People with HIV. *J Am Heart Assoc* **2023**.

- 320 10. Lauer MS, Okin PM, Larson MG, Evans JC, Levy D. Impaired heart rate response to graded  
321 exercise. Prognostic implications of chronotropic incompetence in the Framingham Heart Study.  
322 *Circulation* **1996**; 93:1520-6.
- 323 11. Elhendy A, Mahoney DW, Khandheria BK, Burger K, Pellikka PA. Prognostic significance  
324 of impairment of heart rate response to exercise: impact of left ventricular function and  
325 myocardial ischemia. *J Am Coll Cardiol* **2003**; 42:823-30.
- 326 12. Jae SY, Heffernan K, Kurl S, et al. Chronotropic Response to Exercise Testing and the Risk  
327 of Stroke. *Am J Cardiol* **2021**; 143:46-50.
- 328 13. Lauer MS, Francis GS, Okin PM, Pashkow FJ, Snader CE, Marwick TH. Impaired  
329 chronotropic response to exercise stress testing as a predictor of mortality. *JAMA* **1999**;  
330 281:524-9.
- 331 14. Gulati M, Shaw LJ, Thisted RA, Black HR, Bairey Merz CN, Arnsdorf MF. Heart rate  
332 response to exercise stress testing in asymptomatic women: the st. James women take heart  
333 project. *Circulation* **2010**; 122:130-7.
- 334 15. Reddy YNV, Koepp KE, Carter R, et al. Rate-Adaptive Atrial Pacing for Heart Failure With  
335 Preserved Ejection Fraction: The RAPID-HF Randomized Clinical Trial. *JAMA* **2023**; 329:801-  
336 9.
- 337 16. Keteyian SJ, Brawner CA, Schairer JR, et al. Effects of exercise training on chronotropic  
338 incompetence in patients with heart failure. *Am Heart J* **1999**; 138:233-40.
- 339 17. Coman J, Freedman R, Koplan BA, et al. A blended sensor restores chronotropic response  
340 more favorably than an accelerometer alone in pacemaker patients: the LIFE study results.  
341 *Pacing Clin Electrophysiol* **2008**; 31:1433-42.

- 342 18. Erlandson KM, MaWhinney S, Wilson M, et al. Physical function improvements with  
343 moderate or high-intensity exercise among older adults with or without HIV infection. *AIDS*  
344 **2018**; 32:2317-26.
- 345 19. Khan MN, Pothier CE, Lauer MS. Chronotropic incompetence as a predictor of death among  
346 patients with normal electrograms taking beta blockers (metoprolol or atenolol). *Am J Cardiol*  
347 **2005**; 96:1328-33.
- 348 20. Dobre D, Zannad F, Keteyian SJ, et al. Association between resting heart rate, chronotropic  
349 index, and long-term outcomes in patients with heart failure receiving  $\beta$ -blocker therapy: data  
350 from the HF-ACTION trial. *Eur Heart J* **2013**; 34:2271-80.
- 351 21. Jankowski CM, Mawhinney S, Wilson MP, et al. Body Composition Changes in Response to  
352 Moderate- or High-Intensity Exercise Among Older Adults With or Without HIV Infection.  
353 *J Acq Imm Def* **2020**; 85:340-5.
- 354 22. Craig CL, Marshall AL, Sjöström M, et al. International physical activity questionnaire: 12-  
355 country reliability and validity. *Med Sci Sports Exerc* **2003**; 35:1381-95.
- 356 23. Erlandson KM, Wilson MP, MaWhinney S, et al. The Impact of Moderate or High-Intensity  
357 Combined Exercise on Systemic Inflammation Among Older Persons With and Without HIV. *J*  
358 *Infect Dis* **2021**; 223:1161-70.
- 359 24. Durstenfeld MS PM, Spinelli MA, Li D, Sander E, Swaminathan S, Arechiga VM, Hoh R,  
360 Aras MA, Long CS, Deeks SG, Hsue PY. EXERCISE CAPACITY IS REDUCED IN HIV  
361 INDEPENDENT OF SARS-COV-2 INFECTION In: CROI 2023. (Seattle, WA).
- 362 25. Kawasaki T, Kaimoto S, Sakatani T, et al. Chronotropic incompetence and autonomic  
363 dysfunction in patients without structural heart disease. *Europace* **2010**; 12:561-6.



- 364 26. Brubaker PH, Kitzman DW. Chronotropic incompetence: causes, consequences, and  
365 management. *Circulation* **2011**; 123:1010-20.
- 366 27. Hsue PY, Hunt PW, Ho JE, et al. Impact of HIV infection on diastolic function and left  
367 ventricular mass. *Circ Heart Fail* **2010**; 3:132-9.
- 368 28. Sinha A, Ma Y, Scherzer R, et al. Role of T-Cell Dysfunction, Inflammation, and  
369 Coagulation in Microvascular Disease in HIV. *J Am Heart Assoc* **2016**; 5.
- 370 29. Butler J, Greene SJ, Shah SH, et al. Diastolic Dysfunction in Patients With Human  
371 Immunodeficiency Virus Receiving Antiretroviral Therapy: Results From the CHART Study. *J*  
372 *Card Fail* **2020**; 26:371-80.
- 373 30. Durstenfeld MS, Peluso MJ, Kaveti P, et al. Reduced Exercise Capacity, Chronotropic  
374 Incompetence, and Early Systemic Inflammation in Cardiopulmonary Phenotype Long  
375 Coronavirus Disease 2019. *J Infect Dis* **2023**; 228:542-54.
- 376 31. Tseng ZH, Moffatt E, Kim A, et al. Sudden Cardiac Death and Myocardial Fibrosis,  
377 Determined by Autopsy, in Persons with HIV. *N Engl J Med* **2021**; 384:2306-16.
- 378 32. Hansen D, Dendale P. Modifiable predictors of chronotropic incompetence in male patients  
379 with type 2 diabetes. *J Cardiopulm Rehabil Prev* **2014**; 34:202-7.
- 380 33. Franssen WMA, Keytsman C, Marinus N, et al. Chronotropic incompetence is more frequent  
381 in obese adolescents and relates to systemic inflammation and exercise intolerance. *J Sport*  
382 *Health Sci* **2023**; 12:194-201.
- 383 34. Huang PH, Leu HB, Chen JW, et al. Comparison of endothelial vasodilator function,  
384 inflammatory markers, and N-terminal pro-brain natriuretic peptide in patients with or without  
385 chronotropic incompetence to exercise test. *Heart* **2006**; 92:609-14.

- 386 35. Lauer MS, Pashkow FJ, Larson MG, Levy D. Association of cigarette smoking with  
387 chronotropic incompetence and prognosis in the Framingham Heart Study. *Circulation* **1997**;  
388 96:897-903.
- 389 36. Srivastava R, Blackstone EH, Lauer MS. Association of smoking with abnormal exercise  
390 heart rate responses and long-term prognosis in a healthy, population-based cohort. *Am J Med*  
391 **2000**; 109:20-6.
- 392 37. Wilkoff BL, Miller RE. Exercise testing for chronotropic assessment. *Cardiology clinics*  
393 **1992**; 10:705-17.
- 394
- 395

396 Table 1. Participant Characteristics by HIV Status

|                                                       | HIV (n=32)        | No HIV (n=37)     | p value |
|-------------------------------------------------------|-------------------|-------------------|---------|
| Age                                                   | 55.5 (52, 60.5)   | 58 (53, 64)       | 0.34    |
| Female                                                | 4 (13%)           | 2 (5%)            | 0.41    |
| Male                                                  | 28 (88%)          | 35 (95%)          | 0.54    |
| Race                                                  |                   |                   | 0.09    |
| Black                                                 | 9 (28%)           | 3 (8%)            |         |
| White                                                 | 20 (63%)          | 31 (84%)          |         |
| More than 1 race or other                             | 3 (9%)            | 3 (8%)            |         |
| Hispanic/Latino                                       | 4 (13%)           | 4 (11%)           | 1.00    |
| Medical History                                       |                   |                   |         |
| Hypertension                                          | 16 (50%)          | 25 (68%)          | 0.14    |
| Diabetes                                              | 2 (6%)            | 4 (11%)           | 0.50    |
| Dyslipidemia                                          | 14 (44%)          | 22 (59%)          | 0.19    |
| Depression                                            | 17 (53%)          | 9 (24%)           | 0.01    |
| Coronary Artery Disease*                              | 1 (3%)            | 2 (5%)            | 1.00    |
| Veterans Aging Cohort Study Index, % $\geq$ 20 points | 18 (56%)          | 9 (24%)           | 0.01    |
| Tobacco Use                                           |                   |                   | 0.07    |
| - Never                                               | 11 (34%)          | 23 (62%)          |         |
| - Smoked <10 years and quit                           | 4 (13%)           | 5 (14%)           |         |
| - Smoked >10 years and quit                           | 12 (38%)          | 5 (14%)           |         |
| - Current Smoker                                      | 5 (16%)           | 4 (11%)           |         |
| Marijuana Use (in last year)                          | 19 (59%)          | 5 (14%)           | <0.001  |
| Alcohol Use                                           |                   |                   | 0.21    |
| None                                                  | 10 (31%)          | 6 (16%)           |         |
| 2x/week or less                                       | 19 (59%)          | 23 (62%)          |         |
| Daily                                                 | 3 (9%)            | 8 (22%)           |         |
| Body Composition                                      |                   |                   |         |
| Body Mass Index, kg/m <sup>2</sup>                    | 25.0 (23.8, 28.4) | 28.3 (26, 32.3)   | 0.01    |
| Total Lean Mass, kg                                   | 58.7 (51.6, 64.2) | 59.7 (55.8, 69.1) | 0.06    |
| Total Fat Mass, kg                                    | 20.0 (15.3, 24.0) | 26.3 (22.5, 33.5) | 0.005   |
| Visceral Adipose Tissue Area, cm <sup>2</sup>         | 171 (133, 227)    | 219 (173, 261)    | 0.09    |
| Appendicular Lean Mass, kg/m <sup>2</sup>             | 25.9 (22.6, 29.5) | 26.3 (25.1, 31.4) | 0.07    |
| Percent Fat                                           | 29 $\pm$ 7        | 33 $\pm$ 7        | 0.02    |
| Physical Activity (IPAQ)                              |                   |                   |         |
| Days/Week >10 minutes of Vigorous Activity            | 0 (0, 2)          | 0 (0, 1)          | 0.35    |
| Days/Week >10 minutes Moderate Activity               | 1 (0, 2)          | 1 (0, 2)          | 0.19    |
| Days/Week >10 minutes Walking                         | 3 (0, 7)          | 5 (1, 7)          | 0.69    |
| MET minutes per week                                  | 863 (56, 2097)    | 1215 (264, 2856)  | 0.77    |
| Awake Hours Sitting per Day                           | 6 (4, 9)          | 6 (4,9)           | 0.61    |
| Short Physical Performance Battery                    |                   |                   | 0.14    |

|                                        |                   |                   |        |
|----------------------------------------|-------------------|-------------------|--------|
| Score                                  |                   |                   |        |
| Score $\geq$ 12 (no impairment)        | 21 (66%)          | 31 (84%)          |        |
| Score<12                               | 11 (34%)          | 6 (16%)           |        |
| Current Statin Use                     | 13 (41%)          | 15 (41%)          | 1.00   |
| Integrase inhibitor-containing regimen | 21 (66)           |                   |        |
| Protease inhibitor-containing regimen  | 13 (41)           |                   |        |
| NNRTI-containing regimen               | 9 (28)            |                   |        |
| Any prior zidovudine treatment         | 12 (38)           |                   |        |
| Any prior stavudine treatment          | 14 (44)           |                   |        |
| Current CD4 <sup>+</sup> cell count    | 591 (449, 836)    |                   |        |
| Years since HIV diagnosis              | 21 (16, 28)       |                   |        |
| Estimated years of continuous ART      | 17 (6, 19)        |                   |        |
| Baseline Inflammatory Markers          |                   |                   |        |
| C-Reactive Protein                     | 2.0 (1.0, 3.8)    | 1.1 (0.7, 2.4)    | 0.05*  |
| IL-6                                   | 2.1 (1.4, 2.6)    | 1.8 (1.4, 2.6)    | 0.58*  |
| IL-10                                  | 4.4 (3.2, 6.0)    | 4.1 (3.0, 7.9)    | 0.95*  |
| TNF-a                                  | 1.3 (1.1, 1.7)    | 1.0 (0.8, 1.3)    | 0.01*  |
| sTNFR1                                 | 1147 (937, 1488)  | 1062 (904, 1196)  | 0.18*  |
| sTNFR2                                 | 2769 (2078, 4111) | 2289 (1863, 2865) | 0.05*  |
| sCD14                                  | 1779 (1595, 1959) | 1596 (1309, 1691) | 0.004* |
| IGFBP-3                                | 1704 (1102, 2231) | 1931 (1552, 2297) | 0.13*  |

397 \*Wilcoxon rank sum

398 Table Legend: Coronary artery disease was defined as prior myocardial infarction, bypass  
 399 surgery, angioplasty, or stent. IL=interleukin. TNFR=tumor necrosis factor receptor. CD=Cluster  
 400 of Differentiation. IGFBP=insulin like growth factor binding protein.

401

402 Table 2. Baseline Cardiopulmonary Exercise Testing Results by HIV

|                                               | PWH (n=32)       | Controls (n=37) | P value |
|-----------------------------------------------|------------------|-----------------|---------|
| Duration of Exercise                          | 10.1±3.2 minutes | 9.9±2.6 minutes | 0.78    |
| Respiratory Exchange Ratio <sup>a, b</sup>    | 1.09±0.07        | 1.09±0.6        | 0.71    |
| Peak VO <sub>2</sub> (ml/kg/min) <sup>b</sup> | 25.9±5.7         | 27.2±6.1        | 0.35    |
| Resting (standing) heart rate                 | 75±10            | 79±10           | 0.09    |
| Maximum heart rate                            | 155±13           | 163±17          | 0.08    |
| Age-Predicted Maximum heart rate, % (220-age) | 95±8             | 100±10          | 0.02    |
| Adjusted heart rate reserve, %                | 88±21            | 101±20          | <0.01   |
| Chronotropic Incompetence, n (%)              | 9 (28%)          | 4 (11%)         | 0.07    |

403 Table Legend: Cardiopulmonary exercise testing results by HIV status. Continuous results are  
404 reported as mean ± standard deviation. P values are from t-tests for continuous outcomes and chi-  
405 squared test for categorical variables.

406 Footnotes: a: 3 baseline studies among PWH were submaximal. b. One baseline study was  
407 missing gas exchange information.

408

409 Table 3. Factors Associated with Chronotropic Incompetence

|                                                              | Adjusted Difference in AHRR           | 95% Confidence Interval | P value |
|--------------------------------------------------------------|---------------------------------------|-------------------------|---------|
| HIV <sup>a</sup>                                             | -13%                                  | -22, -4                 | <0.01   |
| Hypertension <sup>b</sup>                                    | -10%                                  | -18, -1                 | 0.02    |
| Dyslipidemia <sup>b</sup>                                    | +7%                                   | -2, 15                  | 0.06    |
| Diabetes <sup>b</sup>                                        | +4%                                   | -10, 17                 | 0.93    |
| Smoking <sup>b</sup>                                         | -16%                                  | -27, -6                 | 0.03    |
| Coronary Artery Disease <sup>b</sup>                         | -29%                                  | -47, -10                | <0.01   |
| Chronotropic Medication Prescribed <sup>b</sup>              | -25%                                  | -48, -2                 | 0.03    |
| Body Mass Index <sup>c</sup>                                 | -17% per standard deviation increase  | -11, -2                 | 0.03    |
| Visceral Adipose Tissue Area <sup>c</sup>                    | -6.6% per standard deviation increase | -11, -2                 | <0.01   |
| Visceral Adipose Tissue Area Independent of BMI <sup>d</sup> | -3.9% per standard deviation increase | -11.6, 3.8              | 0.14    |
| Baseline Physical Activity (MET-Hours per week) <sup>c</sup> | 0.04 per MET-hour/week                | -0.09, 0.02             | 0.49    |
| IL-6 <sup>c</sup>                                            | -6% per doubling                      | -10, -1                 | 0.02    |

410 Footnotes: a. Adjusted for Age, Sex, Body Mass Index. b. Adjusted for Age, Sex, Body Mass  
411 Index, hypertension, dyslipidemia, diabetes, smoking, coronary artery disease, and chronotropic  
412 medications prescribed. C. Adjusted for Age, Sex, and HIV. D. Adjusted for Age, Sex, Body  
413 Mass Index, and HIV.

414 Figure 1. Chronotropy by HIV Status and Time

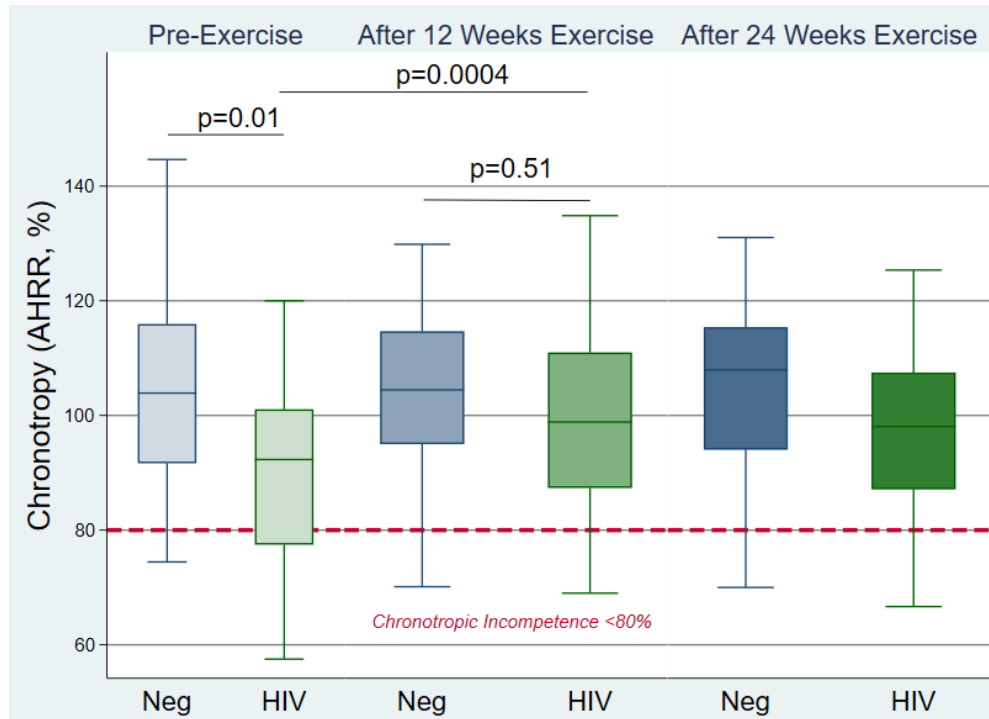

415

416 Figure Legend: Boxplots (median, interquartile range) for adjusted heart rate reserve among  
417 those with and without HIV at baseline, after 12 weeks, and after 24 weeks of exercise. Dashed  
418 line represented the definition for chronotropic incompetence among people not on chronotropic  
419 medications (<80%).

420

421 Figure 2. Association between Chronotropy and Cardiorespiratory Fitness

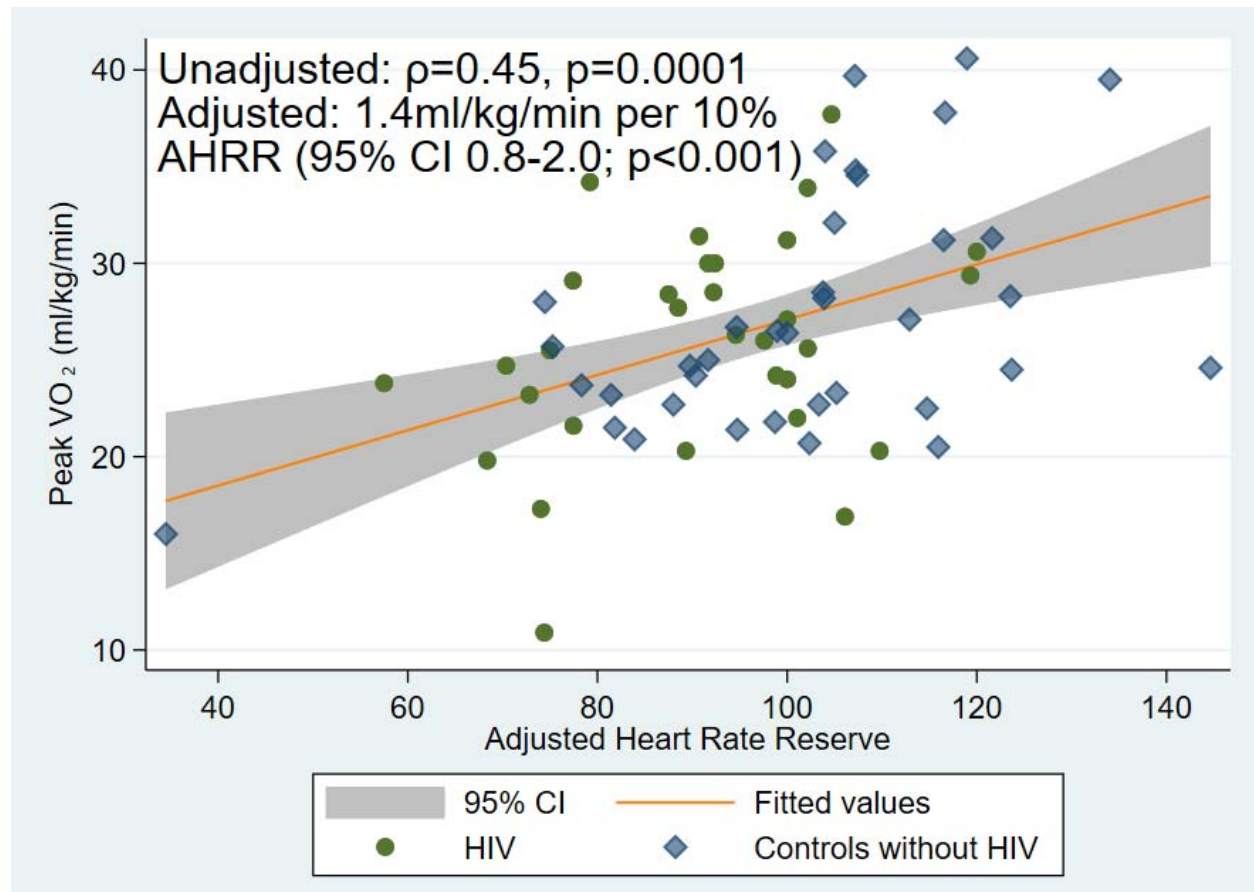

422

423 Figure 2 Legend: Scatter plots and linear fit of the association between adjusted heart rate  
424 reserve (x-axis) and peak VO<sub>2</sub> in ml/kg/min at baseline. Adjusted for age, sex, and body mass  
425 index, each 10% increase in AHRR was associated with a 1.4 ml/kg/min higher peak VO<sub>2</sub>.
